# Supplementary material
Source: PubMed Central journal article supplement (PMC5121384)
Supplement: JCM.01579-16_zjm999095226so1.pdf [file JCM.01579-16_zjm999095226so1.pdf]

|                                                                  | ED; Not Admitted | Non-ED; Not Admitted | Grand Total # (%Total) |
|------------------------------------------------------------------|------------------|----------------------|------------------------|
| Total Included                                                   | 166 (100%)       | 129 (100%)           | 295 (100%)             |
| Age at Testing (%) (N.S.)                                        |                  |                      |                        |
| <40                                                              | 31 (18.7%)       | 25 (19.4%)           | 56 (19%)               |
| 40 to 59                                                         | 48 (28.9%)       | 34 (26.4%)           | 82 (27.8%)             |
| 60 to 79                                                         | 71 (42.8%)       | 60 (46.5%)           | 131 (44.4%)            |
| >= 80                                                            | 16 (9.6%)        | 10 (7.8%)            | 26 (8.8%)              |
| Pathogen Detected (%) (N.S.)                                     |                  |                      |                        |
| Influenza                                                        | 55 (33.1%)       | 50 (38.8%)           | 105 (35.6%)            |
| Non-Influenza Pathogen                                           | 66 (39.8%)       | 43 (33.3%)           | 109 (36.9%)            |
| Negative                                                         | 45 (27.1%)       | 36 (27.9%)           | 81 (27.5%)             |
| Turn-Around-Time (hr) (p < 0.001)                                |                  |                      |                        |
| Clinical TAT#                                                    | 2.3 (4.1)        | 4.4 (4.8)            | 3.2 (4.5)              |
| Intra-Laboratory TAT                                             | 2.0 (3.7)        | 2.1 (1.9)            | 2.0 (3.0)              |
| Underlying Lung Disease (N.S.)                                   |                  |                      |                        |
| Asthma                                                           | 13 (7.8%)        | 7 (5.4%)             | 20 (6.8%)              |
| COPD                                                             | 29 (17.5%)       | 11 (8.5%)            | 40 (13.6%)             |
| Other                                                            | 3 (1.8%)         | 5 (3.9%)             | 8 (2.7%)               |
| None                                                             | 121 (72.9%)      | 106 (82.2%)          | 227 (76.9%)            |
| Immunosuppressed (%) (N.S.)                                      |                  |                      |                        |
| No                                                               | 153 (92.2%)      | 121 (93.8%)          | 274 (92.9%)            |
| Yes                                                              | 13 (7.8%)        | 8 (6.2%)             | 21 (7.1%)              |
| Clinical Syndrome (%)* (p < 0.001)                               |                  |                      |                        |
| Cough / URTI / Bronchitis / Sinusitis / Pharyngitis <sup>#</sup> | 72 (43.4%)       | 90 (69.8%)           | 162 (54.9%)            |
| Specific Viral Pathogen <sup>#</sup>                             | 45 (27.1%)       | 8 (6.2%)             | 53 (18%)               |
| Non-Respiratory Syndrome                                         | 21 (12.7%)       | 23 (17.8%)           | 44 (14.9%)             |
| Other Respiratory Syndrome                                       | 9 (5.4%)         | 3 (2.3%)             | 12 (4.1%)              |
| Pneumonia                                                        | 6 (3.6%)         | 3 (2.3%)             | 9 (3.1%)               |
| COPD                                                             | 11 (6.6%)        | 1 (0.8%)             | 12 (4.1%)              |
| Fever / SIRS / Sepsis                                            | 2 (1.2%)         | 1 (0.8%)             | 3 (1%)                 |

Supplemental Table 1: Demographics of non-admitted ED patients and other outpatients.

\* If multiple ICD-9 codes were used for a visit, only those most directly related to respiratory virus testing were extracted. Data shown are the # of patients in each group with the % of the column total. For TAT, data is Mean (St. Dev.). All categorical data was compared with Chi Squared. TAT was compared via Mann-Whitney U test. For categories with significant differences, adjusted standardized residuals were calculated. N.S. = Not Significant. # indicates an absolute value of the standardized adjusted residual > 2.58 for each row.

|                                | No Abx     | Yes Abx    | Grand Total |
|--------------------------------|------------|------------|-------------|
| Influenza A or B#              | 95 (58.6%) | 39 (35.8%) | 134 (49.4%) |
| hMPV, RSV, PIV, or Adenovirus# | 30 (18.5%) | 38 (34.9%) | 68 (25.1%)  |
| HCoV or HRV/HEV                | 37 (22.8%) | 32 (29.4%) | 69 (25.5%)  |
| Total                          | 162 (100%) | 109 (100%) | 271 (100%)  |

Supplemental Table 2: Rates of antibiotic prescriptions among all patients by pathogen type. Pathogens were grouped as indicated based upon previously existing diagnostic methods (e.g. DFA or singleplex PCR; Influenza, RSV, hMPV, PIV, Adenovirus) or not (HCoV and HRV/HEV). The single patient with *M. pneumoniae* was excluded from this analysis. Data were compared with Chi Squared ( $p < 0.001$ ) and standardized residuals were calculated. # indicates an absolute value of the standardized adjusted residual  $> 2.58$  for each row.
